# Supplementary material
Source: PubMed Central journal article supplement (PMC3286269)
Supplement: supp_111.043679_Supplemental_Table.pdf [file supp_111.043679_Supplemental_Table.pdf]

Supplemental Data

Drug Metabolism and Disposition

Trapping of *cis*-2-butene-1,4-dial to measure furan metabolism in human liver microsomes by cytochrome P450 enzymes

Leah A. Gates, Ding Lu, and Lisa A. Peterson

Division of Environmental Health Sciences and Masonic Cancer Center, University of Minnesota

**Supplemental Table 1. Activity of all microsomal preparations.<sup>a</sup>**

| Sample number <sup>b</sup> | Microsome preparation    | Furan Oxidation<br>pmol BDA/μg protein/min ± S.E. | p-Nitrophenol oxidation<br>pmol <i>p</i> -nitrocatechol/μg protein/min ± S.E. |
|----------------------------|--------------------------|---------------------------------------------------|-------------------------------------------------------------------------------|
| 1                          | HLM 1                    | 0.70 ± 0.03                                       | 0.30 ± 0.05                                                                   |
| 2                          | HLM 2                    | 0.86 ± 0.12                                       | 0.23 ± 0.01                                                                   |
| 3                          | HLM 38                   | 1.25 ± 0.03                                       | 0.21 ± 0.00                                                                   |
| 4                          | HLM 98                   | 0.68 ± 0.15                                       | 0.36 ± 0.05                                                                   |
| 5                          | HLM 108                  | 0.58 ± 0.03                                       | 0.40 ± 0.10                                                                   |
| 6                          | HLM 113                  | 1.59 ± 0.14                                       | 0.35 ± 0.01                                                                   |
| 7                          | HLM 114                  | 5.62 ± 0.01                                       | 1.93 ± 0.09                                                                   |
| 8                          | HLM 116                  | 1.28 ± 0.01                                       | 0.42 ± 0.03                                                                   |
| 9                          | HLM 118                  | 0.00 ± 0.00                                       | 0.01 ± 0.01                                                                   |
| 10                         | HLM 129                  | 0.92 ± 0.17                                       | 0.20 ± 0.03                                                                   |
| 11                         | HLM 131                  | 2.19 ± 0.28                                       | 0.61 ± 0.07                                                                   |
| 12                         | HLM 132                  | 2.69 ± 0.57                                       | 0.40 ± 0.09                                                                   |
| 13                         | HLM 133                  | 0.51 ± 0.07                                       | 0.13 ± 0.09                                                                   |
| 14                         | HLM 134                  | 0.90 ± 0.12                                       | 0.34 ± 0.00                                                                   |
| 15                         | HLM 138                  | 2.79 ± 0.02                                       | 0.31 ± 0.01                                                                   |
| 16                         | HLM 141                  | 0.59 ± 0.08                                       | 0.25 ± 0.12                                                                   |
| 17                         | HLM 917                  | 0.34 ± 0.00                                       | 0.17 ± 0.11                                                                   |
| 18                         | HLM 927                  | 0.10 ± 0.00                                       | 0.21 ± 0.07                                                                   |
| 19                         | HLM 977                  | 0.43 ± 0.00                                       | 0.24 ± 0.05                                                                   |
| 20                         | HLM 901-1                | 0.82 ± 0.11                                       | 0.11 ± 0.09                                                                   |
| 21                         | HLM 901-2                | 1.33 ± 0.06                                       | 0.94 ± 0.18                                                                   |
| R                          | F344 rat                 | 1.16 ± 0.05                                       | 0.24 ± 0.03                                                                   |
| M                          | B6C3F <sub>1</sub> mouse | 3.18 ± 0.20                                       | 0.73 (n=2)                                                                    |

<sup>a</sup>Furan (50 μM), 8 mM NAC and 8 mM NAL or *p*-nitrophenol (100 μM) were incubated with liver microsomes (0.5 mg/ml protein) in the presence of an NADPH regenerating system for 10 (furan) or 30 (*p*-nitrophenol) min at 37 °C. Each sample was run in triplicate.

<sup>b</sup>Labels for each preparation as indicated in Figures 4 and 6A.
